# Supplementary material
Source: PubMed Central journal article supplement (PMC3003299)
Supplement: NIHMS251084-supplement-Revised_Supplemental_File.pdf [file NIHMS251084-supplement-Revised_Supplemental_File.pdf]

**A: Hsp70**

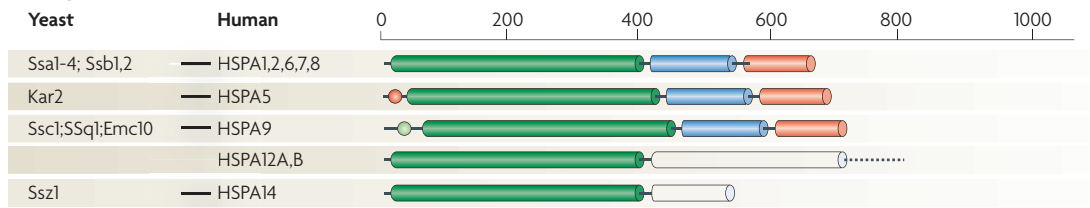

**B: NEFs**

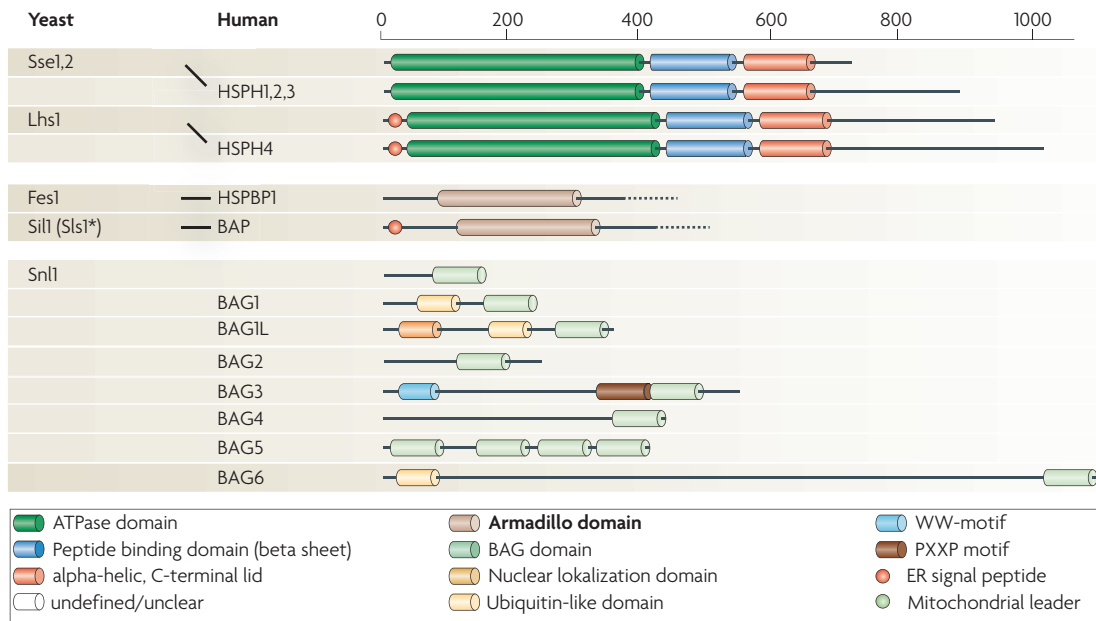

Supplementary information S1 (Figure) | **Diversity in domain architecture of Hsp70-proteins (panel A) and Nucleotide Exchange Factors (panel B) from yeast (*Saccharomyces cerevisiae*) and *Homo sapiens*.** True functional orthologs are connected by lines. For Hsp70s and HspH/Sse's, the distinctions between the indicated peptide-binding domain and C-terminal lids are imprecise: also, the size-variable, acidic loop (between the beta-sheet of the peptide binding domain and the alpha-helical C-terminal lid) in HspH/Sse's is not indicated.

Supplementary information S2 (figure) | **Domain structure of yeast (A) and human (B) J-proteins:** Extension of figure 3 with all individual J-proteins from *Saccharomyces cerevisiae* (A) and *Homo Sapiens* (B) and their most prominent domain features. Proteins are categorized in terms of type (I: bleu, II: green, or III: red) and (assumed) client binding ability and mechanistic mode of functioning. Established functional human-yeast orthologs are indicated. Abbreviation for intracellular localization: C = cytosol; N = nucleus; M = membrane association; Mit = mitochondrial; ER = Endoplasmatic Reticulum; i = inside; a = associated. ERAD = ER associated protein degradation; CBD = Client Binding Domain; HDAC = Histone Deacetylase. Numbers under Refs (references) refer to a list with the most pertinent references that is provided below.

**Panel A | Domain structure of yeast J-proteins**

| Name                                                                | Human Ortholog | Schematic Domain structure | Localization | Function/remarks        | Refs                 |
|---------------------------------------------------------------------|----------------|----------------------------|--------------|-------------------------|----------------------|
| <b>Dnaj-like promiscuous client binding domain</b>                  |                |                            |              |                         |                      |
| Ydj1                                                                | DNAJA1         |                            | C/N/Mit      | folding                 | 1-16                 |
| Xdj1                                                                |                |                            | C/N          | folding (?)             | 17                   |
| Apj1                                                                |                |                            | C/N          | folding (?)             | 18                   |
| Scj1                                                                |                |                            | ER-i         | folding/ERAD            | 19-21                |
| Mdj1                                                                | DNAJA3         |                            | Mit-i        | folding                 | 22-25                |
| Sis1                                                                | DNAJB1         |                            | C/N          | (re)folding             | 4,5,8,10,12<br>26-32 |
| <b>Client binding domain for wide selection of specific clients</b> |                |                            |              |                         |                      |
| Djp1                                                                |                |                            | C            | peroxisomal import      | 33,34                |
| Caj1                                                                |                |                            | N            | unknown                 | 35                   |
| Erf5                                                                |                |                            | ER-i         | folding (CBD unclear)   | 36                   |
| <b>Client binding domain with large degree of specificity</b>       |                |                            |              |                         |                      |
| Jjj1                                                                | DNAJC21        |                            | C            | ribosome biogenesis     | 5,37-39              |
| Jjj3                                                                | DNAJC24        |                            | C            | dipthamide synthesis    | 5                    |
| Jac1                                                                | DNAJC20        |                            | Mit-i        | Fe-S cluster biogenesis | 40-45                |
| Cwc23                                                               | DNAJC17        |                            | C/N          | mRNA splicing           | 5,46                 |
| Swa2                                                                | DNAJC6         |                            | C            | clathrin uncoating      | 47-50                |
| Jem1                                                                |                |                            | ER-i         | nuclear membrane fusion | 19,20,51-53          |
| <b>Existence of client binding domain unclear</b>                   |                |                            |              |                         |                      |
| Jid1                                                                |                |                            | Mit-i        | unknown                 | 54                   |
| Jjj2                                                                |                |                            | C            | unknown                 | 18                   |
| <b>No client binding domain</b>                                     |                |                            |              |                         |                      |
| Sec63                                                               | DNAJC23        |                            | ER-i         | protein import          | 55-61                |
| Zuo1                                                                | DNAJC2         |                            | C            | folding/translation (?) | 5,62-64              |
| Mdj2                                                                |                |                            | Mit-i        | protein import          | 65,66                |
| Pam18                                                               | DNAJC19        |                            | Mit-i        | protein import          | 67-73                |
| Hlj1                                                                |                |                            | ER-a         | ERAD                    | 74,75                |

|                 |                     |                                |                          |                         |
|-----------------|---------------------|--------------------------------|--------------------------|-------------------------|
| J-domain        | Dimerization domain | Transmembrane domain           | Clathrin binding region  | Ribosome binding region |
| G/F rich domain | CTD I lacking ZFLR  | Zinc finger domain             | Tetratricopeptide repeat | ER signal peptide       |
| CTD I with ZFLR | Coiled coil         | Isul binding domain            | SANT domain              | ER retention peptide    |
| CTD II          | Putative CTD I      | Spliceosome interaction domain | UBA domain               | Mitochondrial leader    |

Panel B | Domain structure of human J-proteins

| Name                                                                | Alternative names | Yeast Ortholog | Schematic Domain structure | Localization | Function/remarks          | Refs          |
|---------------------------------------------------------------------|-------------------|----------------|----------------------------|--------------|---------------------------|---------------|
| <b>Dnaj-like promiscuous client binding domain</b>                  |                   |                |                            |              |                           |               |
| DNAJA1                                                              | HSJ2;Dj-2;DJA1    | Ydj1           |                            | C/N/M?       | horm. receptor maturation | 76-80         |
| DNAJA2                                                              | DNAJ;DNAJ3        |                |                            | C/N/M        | G-protein signalling      | 81,82         |
| DNAJA4                                                              | DJ4;Hsj4          |                |                            | C/N/M        | folding                   | 83-85         |
| DNAJA3                                                              | TID1;hTid-1       | Mdj1           |                            | Mit-i/C?     | signalling                | 86-90         |
| DNAJB1                                                              | Hsp40;Hdj-1       | Sis1           |                            | C/N          | (re)folding               | 82,91-95      |
| DNAJB4                                                              | HLJ1;Hsc40        |                |                            | C/N          | unknown                   | 77,96         |
| DNAJB5                                                              | Hsc40;HSP40-3     |                |                            | C/N          | HDAC shuttling            | 96,97         |
| DNAJB11                                                             | ERdj-3;HEDJ       |                |                            | ER-i         | folding                   | 98-102        |
| <b>Client binding domain for wide selection of specific clients</b> |                   |                |                            |              |                           |               |
| DNAJB9                                                              | ERdj-4;Mdg1       |                |                            | ER-i         | ERAD; folding             | 91,99,103,104 |
| DNAJB2a,b                                                           | Hsj1a,b           |                |                            | C/ER-a       | proteasomal degradation   | 105-110       |
| DNAJB6a,b                                                           | HSJ2;MRJ;MSJ1     |                |                            | C/N          | anti-aggregation          | 111-118       |
| DNAJB8                                                              | mDj6              |                |                            | C/N          | anti-aggregation          | 111,119       |
| DNAJB7                                                              | Dj-5;mDj5;HSC3    |                |                            | C/N          | unknown                   | 111,119       |
| DNAJB12a,b                                                          | DJ10;mDJ10        |                |                            | ER-a         | ERAD                      | 120           |
| DNAJB14a,b                                                          | FLJ14281          |                |                            | ?            | unknown                   |               |
| DNAJC18                                                             | MGC29463          |                |                            | ?            | unknown                   |               |
| <b>Client binding domain with large degree of specificity</b>       |                   |                |                            |              |                           |               |
| DNAJC21                                                             | DNAJA5;Jjj1       | Jjj1           |                            | ?            | unknown                   |               |
| DNAJC24                                                             | DPH4;Jjj3         | Jjj3           |                            | C            | diphthamide synthesis     | 121           |
| DNAJC5,5b,g                                                         | CSP               |                |                            | exosomes?    | exocytosis                | 122-128       |
| DNAJC20                                                             | HSCB;Hsc20        | Jacl1          |                            | Mit-i        | FeS cluster biogenesis    | 41,129,130    |
| DNAJC17                                                             | FLJ10634          | Cwc23          |                            | ?            | unknown                   |               |
| DNAJC10                                                             | ERdj-5;JDI1       |                |                            | ER-i         | ERAD                      | 97,131,132    |
| DNAJC16                                                             | KIAA0962          |                |                            | ?            | unknown                   |               |
| DNAJC6                                                              | auxilin           | Swa2           |                            | C            | clathrin uncoating        | 133-141       |
| DNAJC26                                                             | GAK               |                |                            | C/N          | clathrin uncoating        | 136,142-145   |
| DNAJC27                                                             | RBj;RabJ5         |                |                            | ?            | unknown                   |               |
| DNAJC3                                                              | PRKRI;P581PK      |                |                            | ER-i         | translation under stress  | 146-150       |
| DNAJC7                                                              | TTC2;TPR2;mDJ11   |                |                            | C            | hormone maturation        | 151-153       |
| DNAJC29                                                             | ARSACS;sacsin     |                |                            | C/Mit?       | protein degradation?      | 154,155       |
| DNAJC14                                                             | DRIP78;HDJ3;LIP6  |                |                            | C/ER-a/M     | cell surface export       | 156-158       |
| DNAJC22                                                             | wus;FLJ13236      |                |                            | C            | endocytosis?              | 159,160       |
| <b>Existence of client binding domain unclear</b>                   |                   |                |                            |              |                           |               |
| DNAJB13                                                             | TSARG6;RSPH16A    |                |                            | C?           | no HPD!                   | 161,162       |
| DNAJB3                                                              | HCG3;Hsj3;Msj1    |                |                            | C            | folding in sperm          | 163-165       |
| DNAJC13                                                             | RME-8;KIAA0678    |                |                            | C/M          | endosome trafficking      | 166-170       |
| DNAJC28                                                             | Orf28;C21orf55    |                |                            | ?            | unknown                   |               |
| DNAJC9                                                              | JDD1;HDJC9        |                |                            | N            | nuclear exit upon stress  | 171,172       |
| DNAJC8                                                              | SPF31             |                |                            | C            | protein phosphorylation?  | 173           |
| DNAJC25                                                             | bA16L21.2.1       |                |                            | ?            | unknown                   |               |
| DNAJC11                                                             | FLJ10737          |                |                            | Mit-i?       | unknown                   | 174           |
| <b>No client binding domain</b>                                     |                   |                |                            |              |                           |               |
| DNAJC23                                                             | Sec63L;ERdj2      | Sec63          |                            | ER-M         | protein import            | 175,176       |
| DNAJC1                                                              | ERdj1;Mtj1        |                |                            | ER-i         | translation               | 177-181       |
| DNAJC2                                                              | MPP11;zuotin      | Zuo1           |                            | C            | translation               | 182-184       |
| DNAJC15                                                             | DNAJD1;MCJ        |                |                            | Golgi        | degradation oncoproteins  | 185           |
| DNAJC12                                                             | JPDI              |                |                            | ?            | unknown                   | 186           |
| DNAJC19                                                             | TIMM14;Tim14      | Pam18          |                            | Mit-i        | protein import            | 187-189       |
| DNAJC30                                                             | WBSCR18           |                |                            | ?            | unknown                   |               |
| DNAJC4                                                              | HSPF2;MCG18       |                |                            | ?            | unknown                   | 190           |

|                     |                             |                                         |                                  |                          |                      |
|---------------------|-----------------------------|-----------------------------------------|----------------------------------|--------------------------|----------------------|
| J-domain            | CTD I lacking ZFLR          | Coiled coil                             | RNA recognition motif            | GTP binding site         | ER signal peptide    |
| G/F rich domain     | Transmembrane domain        | Zinc finger domain                      | Thioredoxin box                  | Tetratricopeptide repeat | ER retention peptide |
| CTD I with ZFLR     | Putative CTD I              | Cysteine Rich Stretch                   | Extracellular fragment           | HEPN domain              | Mitochondrial leader |
| CTD II              | Ubiquitin-interacting motif | Isul binding domain                     | Tensin binding motif             | Sec63 domain             | Acetyltable lysine   |
| Dimerization domain | CTD I with HDAC BD          | Putative spliceosome interaction domain | Clathrin binding region          | SANT domain              |                      |
| Putative CTD II     | Unidentified protein motif  | Protein kinase domain                   | Putative ribosome binding region |                          |                      |

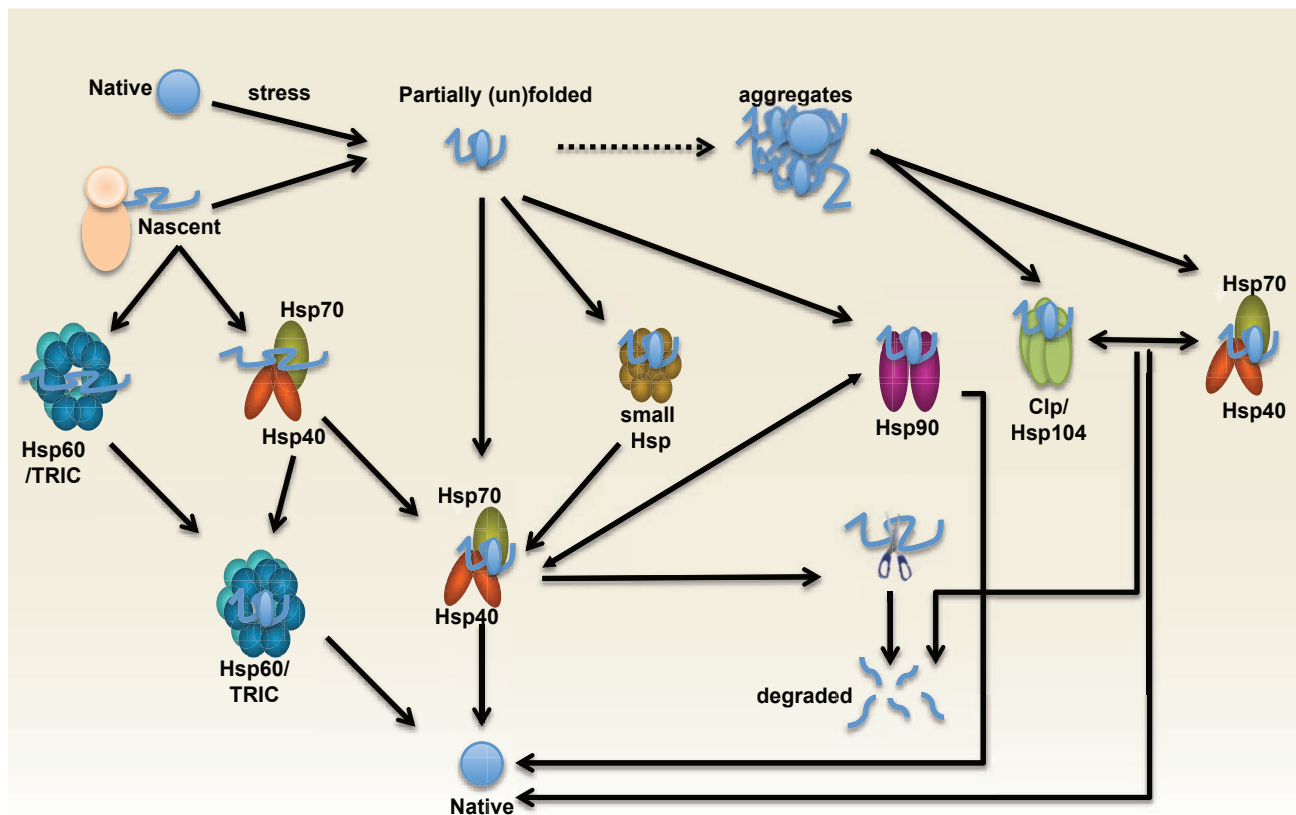

Supplementary information S3 (figure) | **Chaperone networks:** Hsp70 core-machines can form partnerships with at least three other Hsp-families. These include partnerships with the ATP dependent chaperonins (Hsp60/TRIC family), the Hsp90 family and the ATP-independent chaperones of the small Hsp protein (small Hsp) families. In addition, a number of AAA-protease (Clp/Hsp104) protein families, which have also been grouped within the Hsp family, can form partnerships with the Hsp70 core machines. Each of these families is comprised of several members and the size of these families (especially the small Hsps) has increased substantially during evolution. In various processes, the Hsp70 core machine can act simultaneously or sequentially with these other Hsp families in protein (re)folding, -assembly, -degradation, or even -disaggregation (arrows indicate client transfer to and from the various chaperone complexes).
